# Supplementary material
Source: PubMed Central journal article supplement (PMC7264562)
Supplement: MJA2-212-463-s001.pdf [file MJA2-212-463-s001.pdf]

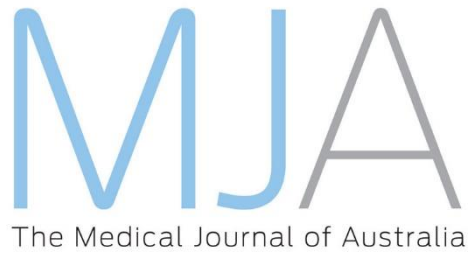

## **Supporting Information**

### **Supplementary tables**

**This appendix was part of the submitted manuscript and has been peer reviewed.  
It is posted as supplied by the authors.**

Appendix to: Litton E, Bucci T, Chavan S, et al. Surge capacity of intensive care units in case of acute increase in demand caused by COVID-19 in Australia. *Med J Aust* 2020; doi: 10.5694/mja2.50596.

## Contents

Table 1. The ANZICS surge survey (p. 3)

Table 2. Sites that responded to the surge survey (p. 4)

Table 3. Ventilator capacity at the 175 respondent surge survey intensive care units (ICUs), by category and jurisdiction (p. 5)

Table 4. Available ventilators per bed at the respondent surge survey intensive care units (ICUs), by hospital type (pp. 6-10)

Table 5. Available ventilators per bed at respondent surge survey intensive care units (ICUs), by jurisdiction (pp. 11-18)

Table 6. Ventilators at veterinary facilities, by jurisdiction and location type (p. 19)

Table 7. Renal replacement therapy machines at the 175 respondent surge survey intensive care units (ICUs), by category and jurisdiction (p. 19)

Table 8. Extracorporeal membrane oxygenation (ECMO) equipment at the 175 respondent surge survey intensive care units, by category and jurisdiction (p. 20)

Table 9. Intravenous infusion pumps at the 175 surge respondent survey intensive care units, by category and jurisdiction (p. 20)

Table 10. Annual number of elective surgery patient admissions to 157 Australian intensive care units for which data were available (p. 21)

**Table 1. The ANZICS surge survey**

| In your <u>hospital</u> today, how many of the following are there? |                                                                                                                                                                                                                                                                     |
|---------------------------------------------------------------------|---------------------------------------------------------------------------------------------------------------------------------------------------------------------------------------------------------------------------------------------------------------------|
| ICU bed capacity                                                    |                                                                                                                                                                                                                                                                     |
| 1                                                                   | Available staffed ICU beds (staffed equipped bed space presently available)                                                                                                                                                                                         |
| 2                                                                   | Physical ICU bed spaces (this should include available staffed beds PLUS any additional physical bed spaces not currently staffed)                                                                                                                                  |
| 3                                                                   | Bed spaces outside of ICU capable of looking after invasively ventilated patients (e.g. in OT recovery areas and ED)                                                                                                                                                |
| 4                                                                   | Bed spaces, not counted above, which, could be used currently or with minor modification to provide care for invasively ventilated patients (e.g. in ward areas with existing wall oxygen, air and other mandatory requirements to deliver mechanical ventilation ) |
| Ventilators                                                         |                                                                                                                                                                                                                                                                     |
| 5                                                                   | Standard 'ICU-style' ventilators capable of providing ongoing invasive mechanical ventilation                                                                                                                                                                       |
| 6                                                                   | Other ventilators (e.g. for transports) capable of providing invasive mechanical ventilation                                                                                                                                                                        |
| 7                                                                   | Anaesthetic machine ventilators                                                                                                                                                                                                                                     |
| 8                                                                   | Non-invasive ventilators capable of delivering invasive ventilation                                                                                                                                                                                                 |
| 9                                                                   | Others                                                                                                                                                                                                                                                              |
| Renal replacement                                                   |                                                                                                                                                                                                                                                                     |
| 10                                                                  | Haemofilters/dialysis machines available for routine use in ICU                                                                                                                                                                                                     |
| 11                                                                  | Machines for haemodialysis used for patients with chronic renal failure                                                                                                                                                                                             |
| Others                                                              |                                                                                                                                                                                                                                                                     |
| 12                                                                  | ECMO machines (allocated for use in your ICU)                                                                                                                                                                                                                       |
| 13                                                                  | Machines being used for cardiopulmonary bypass which could deliver ECMO in ICU                                                                                                                                                                                      |
| 14                                                                  | IV infusion pumps                                                                                                                                                                                                                                                   |

**Table 2. Sites that responded to the surge survey**

|                | ACT      | NSW       | NT       | Qld       | SA        | Tas      | Vic       | WA        | Total      |
|----------------|----------|-----------|----------|-----------|-----------|----------|-----------|-----------|------------|
| Tertiary       | 1        | 11        |          | 10        | 3         | 2        | 6         | 3         | 35         |
| Metropolitan   | 1        | 9         | 1        | 6         | 1         |          | 10        | 3         | 31         |
| Rural/regional |          | 17        | 1        | 7         |           |          | 9         | 1         | 36         |
| Private        | 3        | 20        |          | 13        | 6         | 1        | 17        | 5         | 65         |
| Pediatric      |          | 3         |          | 1         | 1         | 1        | 1         | 1         | 8          |
| <b>Total</b>   | <b>5</b> | <b>60</b> | <b>2</b> | <b>37</b> | <b>11</b> | <b>4</b> | <b>43</b> | <b>13</b> | <b>175</b> |

Alfred Hospital ICU, Austin Hospital ICU, Canberra Hospital ICU, Concord Hospital (Sydney) ICU, Flinders Medical Centre ICU, Gold Coast University Hospital ICU, Gold Coast University Hospital ICU - paed, John Hunter Hospital ICU, Launceston General Hospital ICU, Liverpool Hospital ICU, Mater Adults Hospital (Brisbane) ICU, Monash Medical Centre-Clayton Campus ICU, Nepean Hospital ICU, Prince of Wales Hospital Sydney ICU, Princess Alexandra Hospital ICU, Royal Adelaide ICU, Royal Brisbane and Women's Hospital ICU, Royal Hobart Hospital ICU, Royal Hobart Hospital NICU/PICU, Royal Melbourne Hospital ICU, Royal North Shore Hospital ICU, Women's and Children's Hospital PICU, Angliss Hospital ICU, Armadale Health Service ICU, Bankstown-Lidcombe Hospital ICU, ox Hill Hospital ICU, Caboolture Hospital ICU, Calvary Hospital (Canberra) ICU, Calvary Mater Newcastle ICU, Campbelltown Hospital ICU, Canterbury Hospital ICU, Dandenong Hospital ICU, Fairfield Hospital ICU, Footscray Hospital ICU, Frankston Hospital ICU, Gosford Hospital ICU, Holmesglen Private Hospital ICU, Hornsby Hospital , Ipswich Hospital ICU, Joondalup Health Campus ICU, Logan Hospital ICU, Lyell McEwin Hospital ICU, Maroondah Hospital ICU, Northern Beaches, Queen Elizabeth II Jubilee Hospital ICU, Redcliffe Hospital ICU, Robina Hospital ICU, Rockingham General Hospital ICU, Royal Darwin Hospital ICU, Northern Hospital ICU, Werribee Mercy Hospital ICU, Albury Wodonga Health ICU, Alice Springs Hospital ICU, Ballarat Health Services ICU, Bathurst Base Hospital ICU, Bendigo Health Care Group ICU, Bowral Hospital HDU, Broken Hill Base Hospital & Health Services ICU, Bunbury Regional Hospital ICU, Bundaberg Base Hospital ICU, Cairns Hospital ICU, Central Gippsland Health Service (Sale) ICU, Coffs Harbour Health Campus ICU, Dubbo Base Hospital ICU, Fiona Stanley Hospital ICU, Goulburn Base Hospital ICU, Goulburn Valley Health ICU, Grafton Base Hospital ICU, Hervey Bay Hospital ICU, Latrobe Regional Hospital ICU, Lismore Base Hospital ICU, Mackay Base Hospital ICU, Maitland Hospital ICU, Manning Rural Referral Hospital ICU, Mildura Base Hospital ICU, Mount Isa Hospital ICU, Orange Base Hospital ICU, Port Macquarie Base Hospital ICU, Rockhampton Hospital ICU Shoalhaven Hospital ICU, South East Regional Hospital ICU, South West Healthcare (Warrnambool) ICU, Tamworth Base Hospital ICU, Toowoomba Hospital ICU, Tweed Heads District Hospital ICU, Western District Health Service (Hamilton) ICU, Wyong Hospital ICU, Ashford Private , Buderim Private Hospital ICU, Cabrini Hospital ICU, Calvary Bruce Private Hospital HDU, Calvary Hospital (Lenah Valley) ICU, Calvary John James Hospital ICU, Calvary North Adelaide Hospital ICU, Calvary Wakefield , Epworth Eastern Private Hospital ICU, Epworth Freemasons Hospital ICU, Epworth Geelong ICU, Epworth Hospital (Richmond) ICU, Flinders Private , Gold Coast Private Hospital ICU, Gosford Private Hospital ICU, Greenslopes Private Hospital ICU, Hollywood Private Hospital ICU, Hurstville Private Hospital ICU, John Fawcner Hospital ICU, John Flynn Private Hospital ICU, Kareena Private Hospital ICU, Knox Private Hospital ICU, Lake Macquarie Private Hospital ICU, Lingard Private Hospital ICU, Macquarie University Private Hospital ICU, Maitland Private Hospital ICU, Mater Private Hospital (Brisbane) ICU, Mater Private Hospital (Sydney) ICU, Melbourne Private Hospital ICU, Mount Hospital ICU, Mulgrave Private Hospital ICU, National Capital Private Hospital ICU, Nepean Private Hospital ICU, Newcastle Private Hospital ICU, Noosa Hospital ICU, North Shore Private Hospital ICU, Norwest Private Hospital ICU, Peninsula Private Hospital ICU, Pindara Private Hospital ICU, St Andrew's Hospital (Adelaide) ICU, St Andrew's Hospital Toowoomba ICU, St Andrew's Private Hospital (Ipswich) ICU, St Andrew's War Memorial Hospital ICU, St John of God (Berwick) ICU, St John Of God Health Care (Subiaco) ICU, St John Of God Hospital (Ballarat) ICU, St John of God Hospital (Bendigo) ICU, t John Of God Hospital (Geelong) ICU, and Public & Private ICU, St Vincent's Private Hospital Northside ICU, St Vincent's Private Hospital (Sydney) ICU, St Vincent's Private Hospital Fitzroy ICU, Strathfield Private Hospital ICU, Sunnybank Hospital ICU, Sunshine Coast University Private Hospital ICU, Sydney Adventist Hospital ICU, Sydney Southwest Private Hospital ICU, The Bays Hospital ICU, The Chris O'Brien Lifehouse ICU, The Memorial Hospital (Adelaide) ICU, Warringal Private Hospital ICU, Westmead Private Hospital ICU, Wollongong Private Hospital ICU, John Hunter Children's Hospital PICU, Queensland Children's Hospital PICU, Royal Children's Hospital (Melbourne) PICU, Sydney Children's Hospital PICU, The Children's Hospital at Westmead PICU

**Table 3. Ventilator capacity at the 175 respondent surge survey intensive care units (ICUs), by category and jurisdiction**

|                              | Ventilator type          |                       |                                 |                                                            |            | Total       |
|------------------------------|--------------------------|-----------------------|---------------------------------|------------------------------------------------------------|------------|-------------|
|                              | Standard ICU ventilators | Other ICU ventilators | Anaesthetic machine ventilators | Non-invasive ventilators capable of mechanical ventilation | Other      |             |
| Category                     |                          |                       |                                 |                                                            |            |             |
| Tertiary                     | 980                      | 188                   | 477                             | 190                                                        | 31         | 1866        |
| Metropolitan                 | 314                      | 81                    | 200                             | 78                                                         | 22         | 695         |
| Rural/regional               | 226                      | 91                    | 142                             | 93                                                         | 25         | 577         |
| Private                      | 522                      | 128                   | 633                             | 86                                                         | 49         | 1418        |
| Paediatric                   | 142                      | 44                    | 24                              | 24                                                         | 25         | 259         |
| Jurisdiction                 |                          |                       |                                 |                                                            |            |             |
| Australian Capital Territory | 47                       | 9                     | 34                              | 9                                                          | 0          | 99          |
| New South Wales              | 730                      | 189                   | 545                             | 163                                                        | 89         | 1716        |
| Northern Territory           | 27                       | 8                     | 4                               | 0                                                          | 2          | 41          |
| Queensland                   | 451                      | 89                    | 192                             | 119                                                        | 0          | 851         |
| South Australia              | 204                      | 20                    | 140                             | 36                                                         | 35         | 435         |
| Tasmania                     | 49                       | 18                    | 35                              | 3                                                          | 3          | 108         |
| Victoria                     | 525                      | 146                   | 369                             | 108                                                        | 14         | 1162        |
| Western Australia            | 151                      | 53                    | 157                             | 33                                                         | 9          | 403         |
| <b>Total</b>                 | <b>2184</b>              | <b>532</b>            | <b>1476</b>                     | <b>471</b>                                                 | <b>152</b> | <b>4815</b> |

**Table 4. Available ventilators per bed at the respondent surge survey intensive care units (ICUs), by hospital type**

**A. Tertiary hospitals**

|                                                                                                                                           | Number of ventilators | Ventilators per bed |                                     |                                                              |                                                                       |
|-------------------------------------------------------------------------------------------------------------------------------------------|-----------------------|---------------------|-------------------------------------|--------------------------------------------------------------|-----------------------------------------------------------------------|
|                                                                                                                                           |                       | ICU beds            | ICU beds + additional physical beds | ICU beds + additional physical beds + bed spaces outside ICU | ICU beds + additional physical beds + bed spaces outside ICU + others |
| Total number of beds (35 ICUs)                                                                                                            |                       | 799                 | 1056                                | 1767                                                         | 2147                                                                  |
| Standard ICU ventilators                                                                                                                  | 980                   |                     |                                     |                                                              |                                                                       |
| Mean (SD)                                                                                                                                 |                       | 1.2 (0.6)           | <b>0.9 (0.4)</b>                    | <b>0.6 (0.2)</b>                                             | <b>0.5 (0.3)</b>                                                      |
| Median (IQR)                                                                                                                              |                       | 1.1 (1.0–1.4)       | <b>0.9 (0.8–1.0)</b>                | <b>0.6 (0.4–0.7)</b>                                         | <b>0.4 (0.3–0.7)</b>                                                  |
| Standard ICU ventilators+ other ICU ventilators                                                                                           | 1168                  |                     |                                     |                                                              |                                                                       |
| Mean (SD)                                                                                                                                 |                       | 1.5 (0.7)           | 1.1 (0.4)                           | <b>0.7 (0.2)</b>                                             | <b>0.5 (0.3)</b>                                                      |
| Median (IQR)                                                                                                                              |                       | 1.4 (1.2–1.6)       | 1.1 (0.9–1.2)                       | <b>0.7 (0.5–0.9)</b>                                         | <b>0.5 (0.4–0.8)</b>                                                  |
| Standard ICU ventilators + other ICU ventilators + anaesthetic machine ventilators                                                        | 1645                  |                     |                                     |                                                              |                                                                       |
| Mean (SD)                                                                                                                                 |                       | 2.1 (0.9)           | 1.6 (0.6)                           | <b>0.9 (0.3)</b>                                             | <b>0.8 (0.3)</b>                                                      |
| Median (IQR)                                                                                                                              |                       | 2 (1.6–2.3)         | 1.5 (1.4–1.8)                       | 1.0 (0.8–1.0)                                                | <b>0.8 (0.6–1.0)</b>                                                  |
| Standard ICU ventilators + other ICU ventilators + anaesthetic machine ventilators + non-invasive ventilators                             | 1835                  |                     |                                     |                                                              |                                                                       |
| Mean (SD)                                                                                                                                 |                       | 2.3 (1.3)           | 1.7 (0.6)                           | 1.0 (0.3)                                                    | <b>0.9 (0.4)</b>                                                      |
| Median (IQR)                                                                                                                              |                       | 2.1 (1.9–2.6)       | 1.7 (1.5–2.1)                       | 1.1 (1.0–1.2)                                                | 1.0 (0.7–1.1)                                                         |
| Standard ICU ventilators + other ICU ventilators + anaesthetic machine ventilators + non-invasive ventilators + other non-ICU ventilators | 1866                  |                     |                                     |                                                              |                                                                       |
| Mean (SD)                                                                                                                                 |                       | 2.3 (1.3)           | 1.8 (0.7)                           | 1.1 (0.3)                                                    | <b>0.9 (0.4)</b>                                                      |
| Median (IQR)                                                                                                                              |                       | 2.2 (1.9–2.6)       | 1.7 (1.5–2.1)                       | 1.1 (1.0–1.2)                                                | 1.0 (0.7–1.1)                                                         |

IQR = interquartile range; SD = standard deviation. Bold: mean or median ventilator-too-bed ratio below 1.0.

## B. Metropolitan hospitals

|                                                                                                                                           | Number of ventilators | Ventilators per bed |                                     |                                                              |                                                                       |
|-------------------------------------------------------------------------------------------------------------------------------------------|-----------------------|---------------------|-------------------------------------|--------------------------------------------------------------|-----------------------------------------------------------------------|
|                                                                                                                                           |                       | ICU beds            | ICU beds + additional physical beds | ICU beds + additional physical beds + bed spaces outside ICU | ICU beds + additional physical beds + bed spaces outside ICU + others |
| Total number of beds (31 ICUs)                                                                                                            |                       | 285                 | 412                                 | 733                                                          | 847                                                                   |
| Standard ICU ventilators                                                                                                                  | 314                   |                     |                                     |                                                              |                                                                       |
| Mean (SD)                                                                                                                                 |                       | 1.1 (0.5)           | <b>0.8 (0.4)</b>                    | <b>0.4 (0.3)</b>                                             | <b>0.4 (0.3)</b>                                                      |
| Median (IQR)                                                                                                                              |                       | 1.0 (0.8–1.4)       | <b>0.9 (0.5–1.0)</b>                | <b>0.5 (0.2–0.7)</b>                                         | <b>0.4 (0.2–0.6)</b>                                                  |
| Standard ICU ventilators+ other ICU ventilators                                                                                           | 395                   |                     |                                     |                                                              |                                                                       |
| Mean (SD)                                                                                                                                 |                       | 1.4 (0.6)           | 1.0 (0.4)                           | <b>0.5 (0.4)</b>                                             | <b>0.5 (0.4)</b>                                                      |
| Median (IQR)                                                                                                                              |                       | 1.4 (1.1–1.7)       | 1.0 (0.7–1.2)                       | <b>0.6 (0.3–0.9)</b>                                         | <b>0.5 (0.3–0.7)</b>                                                  |
| Standard ICU ventilators + other ICU ventilators + anaesthetic machine ventilators                                                        | 595                   |                     |                                     |                                                              |                                                                       |
| Mean (SD)                                                                                                                                 |                       | 2.1 (0.8)           | 1.4 (0.6)                           | <b>0.8 (0.5)</b>                                             | <b>0.7 (0.5)</b>                                                      |
| Median (IQR)                                                                                                                              |                       | 1.9 (1.6–2.6)       | 1.4 (1.1–1.8)                       | <b>0.7 (0.5–1.1)</b>                                         | <b>0.7 (0.5–0.9)</b>                                                  |
| Standard ICU ventilators + other ICU ventilators + anaesthetic machine ventilators + non-invasive ventilators                             | 673                   |                     |                                     |                                                              |                                                                       |
| Mean (SD)                                                                                                                                 |                       | 2.4 (1.0)           | 1.6 (0.6)                           | <b>0.9 (0.6)</b>                                             | <b>0.8 (0.6)</b>                                                      |
| Median (IQR)                                                                                                                              |                       | 2.1 (1.8–2.7)       | 1.5 (1.2–2.1)                       | <b>0.9 (0.6–1.3)</b>                                         | <b>0.7 (0.6–1.0)</b>                                                  |
| Standard ICU ventilators + other ICU ventilators + anaesthetic machine ventilators + non-invasive ventilators + other non-ICU ventilators | 695                   |                     |                                     |                                                              |                                                                       |
| Mean (SD)                                                                                                                                 |                       | 2.4 (1.0)           | 1.7 (0.7)                           | <b>0.9 (0.6)</b>                                             | <b>0.8 (0.6)</b>                                                      |
| Median (IQR)                                                                                                                              |                       | 2.1 (1.8–3)         | 1.5 (1.3–2.1)                       | <b>0.9 (0.6–1.3)</b>                                         | <b>0.7 (0.6–1.1)</b>                                                  |

IQR = interquartile range; SD = standard deviation. Bold: mean or median ventilator-to-bed ratio below 1.0.

### C. Rural and regional hospitals

|                                                                                                                                           | Number of ventilators | Ventilators per bed  |                                     |                                                              |                                                                       |
|-------------------------------------------------------------------------------------------------------------------------------------------|-----------------------|----------------------|-------------------------------------|--------------------------------------------------------------|-----------------------------------------------------------------------|
|                                                                                                                                           |                       | ICU beds             | ICU beds + additional physical beds | ICU beds + additional physical beds + bed spaces outside ICU | ICU beds + additional physical beds + bed spaces outside ICU + others |
| Total number of beds (36 ICUs)                                                                                                            |                       | 291                  | 396                                 | 794                                                          | 1064                                                                  |
| Standard ICU ventilators                                                                                                                  | 226                   |                      |                                     |                                                              |                                                                       |
| Mean (SD)                                                                                                                                 |                       | <b>0.8 (0.4)</b>     | <b>0.6 (0.3)</b>                    | <b>0.3 (0.2)</b>                                             | <b>0.2 (0.2)</b>                                                      |
| Median (IQR)                                                                                                                              |                       | <b>0.7 (0.4–0.9)</b> | <b>0.5 (0.4–0.6)</b>                | <b>0.2 (0.2–0.4)</b>                                         | <b>0.2 (0.1–0.4)</b>                                                  |
| Standard ICU ventilators+ other ICU ventilators                                                                                           | 317                   |                      |                                     |                                                              |                                                                       |
| Mean (SD)                                                                                                                                 |                       | 1.1 (0.6)            | <b>0.8 (0.4)</b>                    | <b>0.4 (0.3)</b>                                             | <b>0.3 (0.3)</b>                                                      |
| Median (IQR)                                                                                                                              |                       | <b>0.9 (0.7–1.3)</b> | <b>0.7 (0.5–1.0)</b>                | <b>0.4 (0.2–0.6)</b>                                         | <b>0.3 (0.2–0.5)</b>                                                  |
| Standard ICU ventilators + other ICU ventilators + anaesthetic machine ventilators                                                        | 459                   |                      |                                     |                                                              |                                                                       |
| Mean (SD)                                                                                                                                 |                       | 1.6 (1.0)            | 1.2 (0.7)                           | <b>0.6 (0.4)</b>                                             | <b>0.4 (0.4)</b>                                                      |
| Median (IQR)                                                                                                                              |                       | 1.2 (0.8–1.8)        | 1.0 (0.6–1.3)                       | <b>0.5 (0.4–0.8)</b>                                         | <b>0.4 (0.3–0.7)</b>                                                  |
| Standard ICU ventilators + other ICU ventilators + anaesthetic machine ventilators + non-invasive ventilators                             | 552                   |                      |                                     |                                                              |                                                                       |
| Mean (SD)                                                                                                                                 |                       | 1.9 (1.1)            | 1.4 (0.8)                           | <b>0.7 (0.4)</b>                                             | <b>0.5 (0.4)</b>                                                      |
| Median (IQR)                                                                                                                              |                       | 1.5 (1.2–2.1)        | 1.2 (0.8–1.5)                       | <b>0.7 (0.5–1.0)</b>                                         | <b>0.6 (0.4–0.8)</b>                                                  |
| Standard ICU ventilators + other ICU ventilators + anaesthetic machine ventilators + non-invasive ventilators + other non-ICU ventilators | 577                   |                      |                                     |                                                              |                                                                       |
| Mean (SD)                                                                                                                                 |                       | 2 (1.2)              | 1.5 (0.9)                           | <b>0.7 (0.4)</b>                                             | <b>0.5 (0.4)</b>                                                      |
| Median (IQR)                                                                                                                              |                       | 1.5 (1.2–2.2)        | 1.2 (0.8–1.6)                       | <b>0.7 (0.5–1.0)</b>                                         | <b>0.6 (0.4–0.8)</b>                                                  |

IQR = interquartile range; SD = standard deviation. Bold: mean or median ventilator-to-bed ratio below 1.0.



## D. Private hospitals

|                                                                                                                                           | Number of ventilators | Ventilators per bed  |                                     |                                                              |                                                                       |
|-------------------------------------------------------------------------------------------------------------------------------------------|-----------------------|----------------------|-------------------------------------|--------------------------------------------------------------|-----------------------------------------------------------------------|
|                                                                                                                                           |                       | ICU beds             | ICU beds + additional physical beds | ICU beds + additional physical beds + bed spaces outside ICU | ICU beds + additional physical beds + bed spaces outside ICU + others |
| Total number of beds (65 ICUs)                                                                                                            |                       | 725                  | 783                                 | 1730                                                         | 2166                                                                  |
| Standard ICU ventilators                                                                                                                  | 522                   |                      |                                     |                                                              |                                                                       |
| Mean (SD)                                                                                                                                 |                       | <b>0.7 (0.7)</b>     | <b>0.7 (0.4)</b>                    | <b>0.3 (0.2)</b>                                             | <b>0.2 (0.2)</b>                                                      |
| Median (IQR)                                                                                                                              |                       | <b>0.6 (0.4–1.0)</b> | <b>0.5 (0.4–0.9)</b>                | <b>0.3 (0.2–0.4)</b>                                         | <b>0.2 (0.1–0.4)</b>                                                  |
| Standard ICU ventilators+ other ICU ventilators                                                                                           | 650                   |                      |                                     |                                                              |                                                                       |
| Mean (SD)                                                                                                                                 |                       | <b>0.9 (1.0)</b>     | <b>0.8 (0.4)</b>                    | <b>0.4 (0.2)</b>                                             | <b>0.3 (0.2)</b>                                                      |
| Median (IQR)                                                                                                                              |                       | <b>0.8 (0.5–1.1)</b> | <b>0.7 (0.5–1.0)</b>                | <b>0.3 (0.2–0.5)</b>                                         | <b>0.3 (0.2–0.5)</b>                                                  |
| Standard ICU ventilators + other ICU ventilators + anaesthetic machine ventilators                                                        | 1283                  |                      |                                     |                                                              |                                                                       |
| Mean (SD)                                                                                                                                 |                       | 1.8 (1.8)            | 1.6 (0.9)                           | <b>0.7 (0.5)</b>                                             | <b>0.6 (0.5)</b>                                                      |
| Median (IQR)                                                                                                                              |                       | 1.7 (1.1–2.3)        | 1.5 (1.1–2.2)                       | <b>0.7 (0.5–1.0)</b>                                         | <b>0.6 (0.4–0.8)</b>                                                  |
| Standard ICU ventilators + other ICU ventilators + anaesthetic machine ventilators + non-invasive ventilators                             | 1369                  |                      |                                     |                                                              |                                                                       |
| Mean (SD)                                                                                                                                 |                       | 1.9 (2)              | 1.7 (0.9)                           | <b>0.8 (0.5)</b>                                             | <b>0.6 (0.5)</b>                                                      |
| Median (IQR)                                                                                                                              |                       | 1.7 (1.2–2.4)        | 1.7 (1.1–2.3)                       | <b>0.8 (0.6–1.0)</b>                                         | <b>0.6 (0.4–0.9)</b>                                                  |
| Standard ICU ventilators + other ICU ventilators + anaesthetic machine ventilators + non-invasive ventilators + other non-ICU ventilators | 1418                  |                      |                                     |                                                              |                                                                       |
| Mean (SD)                                                                                                                                 |                       | 2.0 (2.0)            | 1.8 (1.0)                           | <b>0.8 (0.5)</b>                                             | <b>0.7 (0.5)</b>                                                      |
| Median (IQR)                                                                                                                              |                       | 1.7 (1.2–2.8)        | 1.7 (1.1–2.4)                       | <b>0.8 (0.6–1.1)</b>                                         | <b>0.6 (0.4–0.9)</b>                                                  |

IQR = interquartile range; SD = standard deviation. Bold: mean or median ventilator-to-bed ratio below 1.0.

## E. Paediatric hospitals

|                                                                                                                                           | Number of ventilators | Ventilators per bed |                                     |                                                              |                                                                       |
|-------------------------------------------------------------------------------------------------------------------------------------------|-----------------------|---------------------|-------------------------------------|--------------------------------------------------------------|-----------------------------------------------------------------------|
|                                                                                                                                           |                       | ICU beds            | ICU beds + additional physical beds | ICU beds + additional physical beds + bed spaces outside ICU | ICU beds + additional physical beds + bed spaces outside ICU + others |
| Total number of beds (8 ICUs)                                                                                                             |                       | 128                 | 168                                 | 214                                                          | 262                                                                   |
| Standard ICU ventilators                                                                                                                  | 142                   |                     |                                     |                                                              |                                                                       |
| Mean (SD)                                                                                                                                 |                       | 1.1 (0.5)           | <b>0.8 (0.4)</b>                    | <b>0.7 (0.4)</b>                                             | <b>0.5 (0.4)</b>                                                      |
| Median (IQR)                                                                                                                              |                       | 1.0 (0.9–1.2)       | <b>0.8 (0.6–0.9)</b>                | <b>0.6 (0.4–0.7)</b>                                         | <b>0.4 (0.3–0.5)</b>                                                  |
| Standard ICU ventilators+ other ICU ventilators                                                                                           | 186                   |                     |                                     |                                                              |                                                                       |
| Mean (SD)                                                                                                                                 |                       | 1.5 (0.6)           | 1.1 (0.4)                           | <b>0.9 (0.4)</b>                                             | <b>0.7 (0.4)</b>                                                      |
| Median (IQR)                                                                                                                              |                       | 1.4 (1.0–1.5)       | 1.0 (0.9–1.1)                       | <b>0.8 (0.6–1.1)</b>                                         | <b>0.6 (0.5–0.8)</b>                                                  |
| Standard ICU ventilators + other ICU ventilators + anaesthetic machine ventilators                                                        | 210                   |                     |                                     |                                                              |                                                                       |
| Mean (SD)                                                                                                                                 |                       | 1.6 (0.8)           | 1.3 (0.5)                           | 1.0 (0.4)                                                    | <b>0.8 (0.4)</b>                                                      |
| Median (IQR)                                                                                                                              |                       | 1.4 (1.0–2)         | 1.0 (1.0–1.4)                       | <b>0.8 (0.7–1.1)</b>                                         | <b>0.7 (0.5–1.1)</b>                                                  |
| Standard ICU ventilators + other ICU ventilators + anaesthetic machine ventilators + non-invasive ventilators                             | 234                   |                     |                                     |                                                              |                                                                       |
| Mean (SD)                                                                                                                                 |                       | 1.8 (1.1)           | 1.4 (0.6)                           | 1.1 (0.5)                                                    | <b>0.9 (0.5)</b>                                                      |
| Median (IQR)                                                                                                                              |                       | 1.5 (1.0–2.2)       | 1.1 (1.0–1.8)                       | 1.0 (0.7–1.3)                                                | <b>0.9 (0.5–1.2)</b>                                                  |
| Standard ICU ventilators + other ICU ventilators + anaesthetic machine ventilators + non-invasive ventilators + other non-ICU ventilators | 259                   |                     |                                     |                                                              |                                                                       |
| Mean (SD)                                                                                                                                 |                       | 2.0 (1.1)           | 1.5 (0.7)                           | 1.2 (0.6)                                                    | 1.0 (0.5)                                                             |
| Median (IQR)                                                                                                                              |                       | 1.9 (1.5–2.3)       | 1.3 (1.1–1.9)                       | 1.1 (0.8–1.6)                                                | <b>0.9 (0.5–1.3)</b>                                                  |

IQR = interquartile range; SD = standard deviation. Bold: mean or median ventilator-to-bed ratio below 1.0.

**Table 5. Available ventilators per bed at respondent surge survey intensive care units (ICUs), by jurisdiction**

**A. New South Wales**

|                                                                                                                                           | Number of ventilators | Ventilators per bed |                                     |                                                              |                                                                       |
|-------------------------------------------------------------------------------------------------------------------------------------------|-----------------------|---------------------|-------------------------------------|--------------------------------------------------------------|-----------------------------------------------------------------------|
|                                                                                                                                           |                       | ICU beds            | ICU beds + additional physical beds | ICU beds + additional physical beds + bed spaces outside ICU | ICU beds + additional physical beds + bed spaces outside ICU + others |
| Total number of beds (60 ICUs)                                                                                                            |                       | 854                 | 1033                                | 2067                                                         | 2579                                                                  |
| Standard ICU ventilators                                                                                                                  | 730                   |                     |                                     |                                                              |                                                                       |
| Mean (SD)                                                                                                                                 |                       | <b>0.9 (0.8)</b>    | <b>0.7 (0.4)</b>                    | <b>0.4 (0.3)</b>                                             | <b>0.3 (0.3)</b>                                                      |
| Median (IQR)                                                                                                                              |                       | 1.0 (0.6–1.3)       | <b>0.8 (0.5–1.0)</b>                | <b>0.5 (0.3–0.6)</b>                                         | <b>0.4 (0.3–0.6)</b>                                                  |
| Standard ICU ventilators+ other ICU ventilators                                                                                           | 919                   |                     |                                     |                                                              |                                                                       |
| Mean (SD)                                                                                                                                 |                       | 1.1 (1.0)           | <b>0.9 (0.4)</b>                    | <b>0.4 (0.4)</b>                                             | <b>0.4 (0.4)</b>                                                      |
| Median (IQR)                                                                                                                              |                       | 1.2 (0.8–1.6)       | 1.0 (0.7–1.2)                       | <b>0.6 (0.4–0.8)</b>                                         | <b>0.5 (0.3–0.7)</b>                                                  |
| Standard ICU ventilators + other ICU ventilators + anaesthetic machine ventilators                                                        | 1464                  |                     |                                     |                                                              |                                                                       |
| Mean (SD)                                                                                                                                 |                       | 1.7 (1.7)           | 1.4 (0.7)                           | <b>0.7 (0.5)</b>                                             | <b>0.6 (0.5)</b>                                                      |
| Median (IQR)                                                                                                                              |                       | 1.9 (1.3–2.5)       | 1.5 (1.0–2.1)                       | <b>0.8 (0.6–1.1)</b>                                         | <b>0.7 (0.5–1.0)</b>                                                  |
| Standard ICU ventilators + other ICU ventilators + anaesthetic machine ventilators + non-invasive ventilators                             | 1627                  |                     |                                     |                                                              |                                                                       |
| Mean (SD)                                                                                                                                 |                       | 1.9 (2)             | 1.6 (0.8)                           | <b>0.8 (0.6)</b>                                             | <b>0.6 (0.6)</b>                                                      |
| Median (IQR)                                                                                                                              |                       | 2.1 (1.5–2.8)       | 1.7 (1.2–2.2)                       | <b>0.9 (0.7–1.3)</b>                                         | <b>0.8 (0.6–1.0)</b>                                                  |
| Standard ICU ventilators + other ICU ventilators + anaesthetic machine ventilators + non-invasive ventilators + other non-ICU ventilators | 1716                  |                     |                                     |                                                              |                                                                       |
| Mean (SD)                                                                                                                                 |                       | 2.0 (2.0)           | 1.7 (0.8)                           | <b>0.8 (0.6)</b>                                             | <b>0.7 (0.6)</b>                                                      |
| Median (IQR)                                                                                                                              |                       | 2.2 (1.6–2.9)       | 1.7 (1.2–2.4)                       | 1.0 (0.7–1.4)                                                | <b>0.8 (0.6–1.2)</b>                                                  |

IQR = interquartile range; SD = standard deviation. Bold: mean or median ventilator-to-bed ratio below 1.0.

## B. Victoria

|                                                                                                                                           | Number of ventilators | Ventilators per bed |                                     |                                                              |                                                                       |
|-------------------------------------------------------------------------------------------------------------------------------------------|-----------------------|---------------------|-------------------------------------|--------------------------------------------------------------|-----------------------------------------------------------------------|
|                                                                                                                                           |                       | ICU beds            | ICU beds + additional physical beds | ICU beds + additional physical beds + bed spaces outside ICU | ICU beds + additional physical beds + bed spaces outside ICU + others |
| Total number of beds (43 ICUs)                                                                                                            |                       | 499                 | 648                                 | 1314                                                         | 1665                                                                  |
| Standard ICU ventilators                                                                                                                  | 525                   |                     |                                     |                                                              |                                                                       |
| Mean (SD)                                                                                                                                 |                       | 1.1 (0.6)           | <b>0.8 (0.3)</b>                    | <b>0.4 (0.3)</b>                                             | <b>0.3 (0.3)</b>                                                      |
| Median (IQR)                                                                                                                              |                       | 1.0 (0.7–1.3)       | <b>0.8 (0.5–0.9)</b>                | <b>0.4 (0.2–0.7)</b>                                         | <b>0.3 (0.2–0.6)</b>                                                  |
| Standard ICU ventilators+ other ICU ventilators                                                                                           | 671                   |                     |                                     |                                                              |                                                                       |
| Mean (SD)                                                                                                                                 |                       | 1.3 (0.7)           | 1.0 (0.4)                           | <b>0.5 (0.3)</b>                                             | <b>0.4 (0.3)</b>                                                      |
| Median (IQR)                                                                                                                              |                       | 1.2 (0.9–1.5)       | 1.0 (0.6–1.1)                       | <b>0.6 (0.3–0.8)</b>                                         | <b>0.4 (0.3–0.7)</b>                                                  |
| Standard ICU ventilators + other ICU ventilators + anaesthetic machine ventilators                                                        | 1040                  |                     |                                     |                                                              |                                                                       |
| Mean (SD)                                                                                                                                 |                       | 2.1 (1.0)           | 1.6 (0.6)                           | <b>0.8 (0.4)</b>                                             | <b>0.6 (0.4)</b>                                                      |
| Median (IQR)                                                                                                                              |                       | 1.8 (1.2–2.2)       | 1.4 (0.9–1.7)                       | <b>0.9 (0.5–1.0)</b>                                         | <b>0.7 (0.4–0.9)</b>                                                  |
| Standard ICU ventilators + other ICU ventilators + anaesthetic machine ventilators + non-invasive ventilators                             | 1148                  |                     |                                     |                                                              |                                                                       |
| Mean (SD)                                                                                                                                 |                       | 2.3 (1.3)           | 1.8 (0.7)                           | <b>0.9 (0.4)</b>                                             | <b>0.7 (0.4)</b>                                                      |
| Median (IQR)                                                                                                                              |                       | 2.0 (1.4–2.5)       | 1.5 (1.1–2)                         | 1.0 (0.6–1.1)                                                | <b>0.8 (0.6–1.0)</b>                                                  |
| Standard ICU ventilators + other ICU ventilators + anaesthetic machine ventilators + non-invasive ventilators + other non-ICU ventilators | 1162                  |                     |                                     |                                                              |                                                                       |
| Mean (SD)                                                                                                                                 |                       | 2.3 (1.4)           | 1.8 (0.9)                           | <b>0.9 (0.4)</b>                                             | <b>0.7 (0.4)</b>                                                      |
| Median (IQR)                                                                                                                              |                       | 2.0 (1.4–2.7)       | 1.5 (1.1–2)                         | 1.0 (0.8–1.1)                                                | <b>0.8 (0.6–1.1)</b>                                                  |

IQR = interquartile range; SD = standard deviation. Bold: mean or median ventilator-to-bed ratio below 1.0.

### C. Queensland

|                                                                                                                                           | Number of ventilators | Ventilators per bed  |                                     |                                                              |                                                                       |
|-------------------------------------------------------------------------------------------------------------------------------------------|-----------------------|----------------------|-------------------------------------|--------------------------------------------------------------|-----------------------------------------------------------------------|
|                                                                                                                                           |                       | ICU beds             | ICU beds + additional physical beds | ICU beds + additional physical beds + bed spaces outside ICU | ICU beds + additional physical beds + bed spaces outside ICU + others |
| Total number of beds (37 ICUs)                                                                                                            |                       | 376                  | 530                                 | 792                                                          | 891                                                                   |
| Standard ICU ventilators                                                                                                                  | 451                   |                      |                                     |                                                              |                                                                       |
| Mean (SD)                                                                                                                                 |                       | 1.2 (0.4)            | <b>0.9 (0.3)</b>                    | <b>0.6 (0.2)</b>                                             | <b>0.5 (0.1)</b>                                                      |
| Median (IQR)                                                                                                                              |                       | <b>0.5 (0.4–0.8)</b> | <b>0.5 (0.3–0.7)</b>                | <b>0.2 (0.1–0.3)</b>                                         | <b>0.2 (0.1–0.3)</b>                                                  |
| Standard ICU ventilators+ other ICU ventilators                                                                                           | 540                   |                      |                                     |                                                              |                                                                       |
| Mean (SD)                                                                                                                                 |                       | 1.4 (0.5)            | 1.0 (0.4)                           | <b>0.7 (0.2)</b>                                             | <b>0.6 (0.2)</b>                                                      |
| Median (IQR)                                                                                                                              |                       | <b>0.6 (0.5–1.0)</b> | <b>0.6 (0.4–1.0)</b>                | <b>0.3 (0.2–0.4)</b>                                         | <b>0.2 (0.1–0.4)</b>                                                  |
| Standard ICU ventilators + other ICU ventilators + anaesthetic machine ventilators                                                        | 732                   |                      |                                     |                                                              |                                                                       |
| Mean (SD)                                                                                                                                 |                       | 1.9 (1.0)            | 1.4 (0.9)                           | <b>0.9 (0.4)</b>                                             | <b>0.8 (0.3)</b>                                                      |
| Median (IQR)                                                                                                                              |                       | 1.4 (1.1–1.9)        | 1.3 (0.9–1.8)                       | <b>0.6 (0.4–0.8)</b>                                         | <b>0.5 (0.3–0.7)</b>                                                  |
| Standard ICU ventilators + other ICU ventilators + anaesthetic machine ventilators + non-invasive ventilators                             | 851                   |                      |                                     |                                                              |                                                                       |
| Mean (SD)                                                                                                                                 |                       | 2.3 (1.0)            | 1.6 (0.9)                           | 1.1 (0.4)                                                    | 1.0 (0.3)                                                             |
| Median (IQR)                                                                                                                              |                       | 1.6 (1.2–1.9)        | 1.4 (1.0–1.8)                       | <b>0.6 (0.5–0.9)</b>                                         | <b>0.5 (0.3–0.7)</b>                                                  |
| Standard ICU ventilators + other ICU ventilators + anaesthetic machine ventilators + non-invasive ventilators + other non-ICU ventilators | 851                   |                      |                                     |                                                              |                                                                       |
| Mean (SD)                                                                                                                                 |                       | 2.3 (1.2)            | 1.6 (1.0)                           | 1.1 (0.4)                                                    | 1.0 (0.3)                                                             |
| Median (IQR)                                                                                                                              |                       | 1.6 (1.2–1.9)        | 1.4 (1.0–1.8)                       | <b>0.6 (0.5–0.9)</b>                                         | <b>0.5 (0.3–0.8)</b>                                                  |

IQR = interquartile range; SD = standard deviation. Bold: mean or median ventilator-to-bed ratio below 1.0.

## D. South Australia

|                                                                                                                                           | Number of ventilators | Ventilators per bed  |                                     |                                                              |                                                                       |
|-------------------------------------------------------------------------------------------------------------------------------------------|-----------------------|----------------------|-------------------------------------|--------------------------------------------------------------|-----------------------------------------------------------------------|
|                                                                                                                                           |                       | ICU beds             | ICU beds + additional physical beds | ICU beds + additional physical beds + bed spaces outside ICU | ICU beds + additional physical beds + bed spaces outside ICU + others |
| Total number of beds (11 ICUs)                                                                                                            |                       | 193                  | 234                                 | 327                                                          | 348                                                                   |
| Standard ICU ventilators                                                                                                                  | 204                   |                      |                                     |                                                              |                                                                       |
| Mean (SD)                                                                                                                                 |                       | 1.1 (0.4)            | <b>0.9 (0.2)</b>                    | <b>0.6 (0.1)</b>                                             | <b>0.6 (0.1)</b>                                                      |
| Median (IQR)                                                                                                                              |                       | <b>0.5 (0.2–0.6)</b> | <b>0.4 (0.2–0.4)</b>                | <b>0.2 (0–0.2)</b>                                           | <b>0.2 (0–0.2)</b>                                                    |
| Standard ICU ventilators+ other ICU ventilators                                                                                           | 224                   |                      |                                     |                                                              |                                                                       |
| Mean (SD)                                                                                                                                 |                       | 1.2 (0.8)            | 1.0 (0.4)                           | <b>0.7 (0.2)</b>                                             | <b>0.6 (0.2)</b>                                                      |
| Median (IQR)                                                                                                                              |                       | <b>0.8 (0.3–1.0)</b> | <b>0.7 (0.2–0.8)</b>                | <b>0.2 (0.1–0.4)</b>                                         | <b>0.2 (0.1–0.3)</b>                                                  |
| Standard ICU ventilators + other ICU ventilators + anaesthetic machine ventilators                                                        | 364                   |                      |                                     |                                                              |                                                                       |
| Mean (SD)                                                                                                                                 |                       | 1.9 (1.3)            | 1.6 (0.6)                           | 1.1 (0.3)                                                    | 1.0 (0.3)                                                             |
| Median (IQR)                                                                                                                              |                       | 1.2 (0.6–1.6)        | 1.0 (0.5–1.2)                       | <b>0.5 (0.1–0.6)</b>                                         | <b>0.4 (0.1–0.5)</b>                                                  |
| Standard ICU ventilators + other ICU ventilators + anaesthetic machine ventilators + non-invasive ventilators                             | 400                   |                      |                                     |                                                              |                                                                       |
| Mean (SD)                                                                                                                                 |                       | 2.1 (1.5)            | 1.7 (0.7)                           | 1.2 (0.4)                                                    | 1.1 (0.3)                                                             |
| Median (IQR)                                                                                                                              |                       | 1.5 (0.7–2)          | 1.2 (0.4–1.5)                       | <b>0.6 (0.2–0.7)</b>                                         | <b>0.5 (0.2–0.6)</b>                                                  |
| Standard ICU ventilators + other ICU ventilators + anaesthetic machine ventilators + non-invasive ventilators + other non-ICU ventilators | 435                   |                      |                                     |                                                              |                                                                       |
| Mean (SD)                                                                                                                                 |                       | 2.3 (1.5)            | 1.9 (0.7)                           | 1.3 (0.4)                                                    | 1.3 (0.3)                                                             |
| Median (IQR)                                                                                                                              |                       | 1.5 (0.7–2)          | 1.2 (0.4–1.5)                       | <b>0.6 (0.2–0.7)</b>                                         | <b>0.5 (0.2–0.6)</b>                                                  |

IQR = interquartile range; SD = standard deviation. Bold: mean or median ventilator-to-bed ratio below 1.0.

## E. Western Australia

|                                                                                                                                           | Number of ventilators | Ventilators per bed |                                     |                                                              |                                                                       |
|-------------------------------------------------------------------------------------------------------------------------------------------|-----------------------|---------------------|-------------------------------------|--------------------------------------------------------------|-----------------------------------------------------------------------|
|                                                                                                                                           |                       | ICU beds            | ICU beds + additional physical beds | ICU beds + additional physical beds + bed spaces outside ICU | ICU beds + additional physical beds + bed spaces outside ICU + others |
| Total number of beds (13 ICUs)                                                                                                            |                       | 179                 | 210                                 | 442                                                          | 561                                                                   |
| Standard ICU ventilators                                                                                                                  | 151                   |                     |                                     |                                                              |                                                                       |
| Mean (SD)                                                                                                                                 |                       | <b>0.8 (0.3)</b>    | <b>0.7 (0.3)</b>                    | <b>0.3 (0.2)</b>                                             | <b>0.3 (0.2)</b>                                                      |
| Median (IQR)                                                                                                                              |                       | <b>0.5 (0–0.7)</b>  | <b>0.4 (0–0.5)</b>                  | <b>0.2 (0–0.3)</b>                                           | <b>0.1 (0–0.3)</b>                                                    |
| Standard ICU ventilators+ other ICU ventilators                                                                                           | 204                   |                     |                                     |                                                              |                                                                       |
| Mean (SD)                                                                                                                                 |                       | 1.1 (0.4)           | 1.0 (0.4)                           | <b>0.5 (0.2)</b>                                             | <b>0.4 (0.2)</b>                                                      |
| Median (IQR)                                                                                                                              |                       | <b>0.6 (0–1.0)</b>  | <b>0.5 (0–0.8)</b>                  | <b>0.3 (0–0.4)</b>                                           | <b>0.2 (0–0.4)</b>                                                    |
| Standard ICU ventilators + other ICU ventilators + anaesthetic machine ventilators                                                        | 361                   |                     |                                     |                                                              |                                                                       |
| Mean (SD)                                                                                                                                 |                       | 2 (1.0)             | 1.7 (0.9)                           | <b>0.8 (0.4)</b>                                             | <b>0.6 (0.4)</b>                                                      |
| Median (IQR)                                                                                                                              |                       | 1.2 (0–1.7)         | 1.1 (0–1.7)                         | <b>0.6 (0–0.8)</b>                                           | <b>0.6 (0–0.8)</b>                                                    |
| Standard ICU ventilators + other ICU ventilators + anaesthetic machine ventilators + non-invasive ventilators                             | 394                   |                     |                                     |                                                              |                                                                       |
| Mean (SD)                                                                                                                                 |                       | 2.2 (1.1)           | 1.9 (0.9)                           | <b>0.9 (0.5)</b>                                             | <b>0.7 (0.4)</b>                                                      |
| Median (IQR)                                                                                                                              |                       | 1.3 (0–1.8)         | 1.3 (0–1.7)                         | <b>0.7 (0–1.0)</b>                                           | <b>0.7 (0–0.9)</b>                                                    |
| Standard ICU ventilators + other ICU ventilators + anaesthetic machine ventilators + non-invasive ventilators + other non-ICU ventilators | 403                   |                     |                                     |                                                              |                                                                       |
| Mean (SD)                                                                                                                                 |                       | 2.3 (1.1)           | 1.9 (0.9)                           | <b>0.9 (0.5)</b>                                             | <b>0.7 (0.4)</b>                                                      |
| Median (IQR)                                                                                                                              |                       | 1.3 (0–1.8)         | 1.3 (0–1.7)                         | <b>0.7 (0–1.0)</b>                                           | <b>0.7 (0–0.9)</b>                                                    |

IQR = interquartile range; SD = standard deviation. Bold: mean or median ventilator-to-bed ratio below 1.0.

## F. Northern Territory

|                                                                                                                                           | Number of ventilators | Ventilators per bed |                                     |                                                              |                                                                       |
|-------------------------------------------------------------------------------------------------------------------------------------------|-----------------------|---------------------|-------------------------------------|--------------------------------------------------------------|-----------------------------------------------------------------------|
|                                                                                                                                           |                       | ICU beds            | ICU beds + additional physical beds | ICU beds + additional physical beds + bed spaces outside ICU | ICU beds + additional physical beds + bed spaces outside ICU + others |
| Total number of beds (2 ICUs)                                                                                                             |                       | 24                  | 28                                  | 37                                                           | 47                                                                    |
| Standard ICU ventilators                                                                                                                  | 27                    |                     |                                     |                                                              |                                                                       |
| Mean (SD)                                                                                                                                 |                       | 1.1 (0.2)           | 1.0 (0.2)                           | <b>0.7 (0.2)</b>                                             | <b>0.6 (0.3)</b>                                                      |
| Median (IQR)                                                                                                                              |                       | 1.2 (0.8–0.9)       | 1.0 (0.8–0.9)                       | <b>0.5 (0.3–0.4)</b>                                         | <b>0.5 (0.2–0.4)</b>                                                  |
| Standard ICU ventilators+ other ICU ventilators                                                                                           | 35                    |                     |                                     |                                                              |                                                                       |
| Mean (SD)                                                                                                                                 |                       | 1.5 (0.2)           | 1.3 (0.2)                           | <b>0.9 (0.2)</b>                                             | <b>0.7 (0.3)</b>                                                      |
| Median (IQR)                                                                                                                              |                       | 1.0 (0.9–1.0)       | 1.0 (0.9–1.0)                       | <b>0.5 (0.4–0.5)</b>                                         | <b>0.5 (0.2–0.4)</b>                                                  |
| Standard ICU ventilators + other ICU ventilators + anaesthetic machine ventilators                                                        | 39                    |                     |                                     |                                                              |                                                                       |
| Mean (SD)                                                                                                                                 |                       | 1.6 (0.2)           | 1.4 (0.2)                           | 1.1 (0.1)                                                    | <b>0.8 (0.5)</b>                                                      |
| Median (IQR)                                                                                                                              |                       | 2.3 (2.4–2.5)       | 2.3 (2.4–2.5)                       | 1.0 (1.0–1.1)                                                | 1.0 (0.6–1.0)                                                         |
| Standard ICU ventilators + other ICU ventilators + anaesthetic machine ventilators + non-invasive ventilators                             | 39                    |                     |                                     |                                                              |                                                                       |
| Mean (SD)                                                                                                                                 |                       | 1.6 (0.5)           | 1.4 (0.5)                           | 1.1 (0.02)                                                   | <b>0.8 (0.5)</b>                                                      |
| Median (IQR)                                                                                                                              |                       | 2.3 (2.5–2.8)       | 2.3 (2.5–2.8)                       | 1.1 (1.1–1.1)                                                | 1.0 (0.7–1.0)                                                         |
| Standard ICU ventilators + other ICU ventilators + anaesthetic machine ventilators + non-invasive ventilators + other non-ICU ventilators | 41                    |                     |                                     |                                                              |                                                                       |
| Mean (SD)                                                                                                                                 |                       | 1.7 (0.5)           | 1.5 (0.5)                           | 1.1 (0.02)                                                   | <b>0.9 (0.5)</b>                                                      |
| Median (IQR)                                                                                                                              |                       | 2.3 (2.5–2.8)       | 2.3 (2.5–2.8)                       | 1.1 (1.1–1.1)                                                | 1.0 (0.7–1.0)                                                         |

IQR = interquartile range; SD = standard deviation. Bold: mean or median ventilator-to-bed ratio below 1.0.



## G. Australian Capital Territory

|                                                                                                                                           | Number of ventilators | Ventilators per bed  |                                     |                                                              |                                                                       |
|-------------------------------------------------------------------------------------------------------------------------------------------|-----------------------|----------------------|-------------------------------------|--------------------------------------------------------------|-----------------------------------------------------------------------|
|                                                                                                                                           |                       | ICU beds             | ICU beds + additional physical beds | ICU beds + additional physical beds + bed spaces outside ICU | ICU beds + additional physical beds + bed spaces outside ICU + others |
| Total number of beds (5 ICUs)                                                                                                             |                       | 52                   | 69                                  | 136                                                          | 231                                                                   |
| Standard ICU ventilators                                                                                                                  | 47                    |                      |                                     |                                                              |                                                                       |
| Mean (SD)                                                                                                                                 |                       | <b>0.9 (0.3)</b>     | <b>0.7 (0.1)</b>                    | <b>0.3 (0.1)</b>                                             | <b>0.2 (0.05)</b>                                                     |
| Median (IQR)                                                                                                                              |                       | <b>0.9 (0.6–1.0)</b> | <b>0.6 (0.5–0.6)</b>                | <b>0.2 (0.2–0.3)</b>                                         | <b>0.2 (0.2–0.3)</b>                                                  |
| Standard ICU ventilators+ other ICU ventilators                                                                                           | 56                    |                      |                                     |                                                              |                                                                       |
| Mean (SD)                                                                                                                                 |                       | 1.1 (0.3)            | <b>0.8 (0.1)</b>                    | <b>0.4 (0.1)</b>                                             | <b>0.2 (0.1)</b>                                                      |
| Median (IQR)                                                                                                                              |                       | 1.2 (0.9–1.4)        | <b>0.7 (0.6–0.7)</b>                | <b>0.3 (0.2–0.4)</b>                                         | <b>0.3 (0.2–0.3)</b>                                                  |
| Standard ICU ventilators + other ICU ventilators + anaesthetic machine ventilators                                                        | 90                    |                      |                                     |                                                              |                                                                       |
| Mean (SD)                                                                                                                                 |                       | 1.7 (0.5)            | 1.3 (0.4)                           | <b>0.7 (0.2)</b>                                             | <b>0.4 (0.1)</b>                                                      |
| Median (IQR)                                                                                                                              |                       | 1.9 (1.8–2)          | 1.3 (1.2–1.5)                       | <b>0.5 (0.5–0.6)</b>                                         | <b>0.5 (0.5–0.6)</b>                                                  |
| Standard ICU ventilators + other ICU ventilators + anaesthetic machine ventilators + non-invasive ventilators                             | 99                    |                      |                                     |                                                              |                                                                       |
| Mean (SD)                                                                                                                                 |                       | 1.9 (0.5)            | 1.4 (0.5)                           | <b>0.7 (0.2)</b>                                             | <b>0.4 (0.1)</b>                                                      |
| Median (IQR)                                                                                                                              |                       | 2 (2–2.1)            | 1.3 (1.2–1.5)                       | <b>0.6 (0.5–0.6)</b>                                         | <b>0.6 (0.5–0.6)</b>                                                  |
| Standard ICU ventilators + other ICU ventilators + anaesthetic machine ventilators + non-invasive ventilators + other non-ICU ventilators | 99                    |                      |                                     |                                                              |                                                                       |
| Mean (SD)                                                                                                                                 |                       | 1.9 (0.5)            | 1.4 (0.5)                           | <b>0.7 (0.2)</b>                                             | <b>0.4 (0.1)</b>                                                      |
| Median (IQR)                                                                                                                              |                       | 2.0 (2.0–2.3)        | 1.4 (1.4–1.5)                       | <b>0.6 (0.5–0.6)</b>                                         | <b>0.6 (0.5–0.6)</b>                                                  |

IQR = interquartile range; SD = standard deviation. Bold: mean or median ventilator-to-bed ratio below 1.0.

## H. Tasmania

|                                                                                                                                           | Number of ventilators | Ventilators per bed  |                                     |                                                              |                                                                       |
|-------------------------------------------------------------------------------------------------------------------------------------------|-----------------------|----------------------|-------------------------------------|--------------------------------------------------------------|-----------------------------------------------------------------------|
|                                                                                                                                           |                       | ICU beds             | ICU beds + additional physical beds | ICU beds + additional physical beds + bed spaces outside ICU | ICU beds + additional physical beds + bed spaces outside ICU + others |
| Total number of beds (4 ICUs)                                                                                                             |                       | 51                   | 62                                  | 123                                                          | 164                                                                   |
| Standard ICU ventilators                                                                                                                  | 49                    |                      |                                     |                                                              |                                                                       |
| Mean (SD)                                                                                                                                 |                       | 1.0 (0.3)            | <b>0.8 (0.2)</b>                    | <b>0.4 (0.2)</b>                                             | <b>0.3 (0.2)</b>                                                      |
| Median (IQR)                                                                                                                              |                       | <b>0.8 (0.7–0.8)</b> | <b>0.5 (0.4–0.5)</b>                | <b>0.5 (0.4–0.5)</b>                                         | <b>0.5 (0.4–0.5)</b>                                                  |
| Standard ICU ventilators+ other ICU ventilators                                                                                           | 67                    |                      |                                     |                                                              |                                                                       |
| Mean (SD)                                                                                                                                 |                       | 1.3 (0.3)            | 1.1 (0.2)                           | <b>0.5 (0.2)</b>                                             | <b>0.4 (0.2)</b>                                                      |
| Median (IQR)                                                                                                                              |                       | <b>0.9 (0.8–1.0)</b> | <b>0.6 (0.5–0.6)</b>                | <b>0.6 (0.5–0.6)</b>                                         | <b>0.6 (0.5–0.6)</b>                                                  |
| Standard ICU ventilators + other ICU ventilators + anaesthetic machine ventilators                                                        | 102                   |                      |                                     |                                                              |                                                                       |
| Mean (SD)                                                                                                                                 |                       | 2.0 (0.3)            | 1.6 (0.2)                           | <b>0.8 (0.2)</b>                                             | <b>0.6 (0.2)</b>                                                      |
| Median (IQR)                                                                                                                              |                       | <b>0.9 (0.8–1.0)</b> | <b>0.6 (0.5–0.6)</b>                | <b>0.6 (0.5–0.6)</b>                                         | <b>0.6 (0.5–0.6)</b>                                                  |
| Standard ICU ventilators + other ICU ventilators + anaesthetic machine ventilators + non-invasive ventilators                             | 105                   |                      |                                     |                                                              |                                                                       |
| Mean (SD)                                                                                                                                 |                       | 2.1 (0.4)            | 1.7 (0.2)                           | <b>0.9 (0.2)</b>                                             | <b>0.6 (0.2)</b>                                                      |
| Median (IQR)                                                                                                                              |                       | 1.5 (1.4–1.5)        | <b>0.9 (0.8–1.0)</b>                | <b>0.9 (0.6–1.0)</b>                                         | <b>0.9 (0.6–1.0)</b>                                                  |
| Standard ICU ventilators + other ICU ventilators + anaesthetic machine ventilators + non-invasive ventilators + other non-ICU ventilators | 108                   |                      |                                     |                                                              |                                                                       |
| Mean (SD)                                                                                                                                 |                       | 2.1 (0.4)            | 1.7 (0.2)                           | <b>0.9 (0.2)</b>                                             | <b>0.7 (0.2)</b>                                                      |
| Median (IQR)                                                                                                                              |                       | 1.5 (1.4–1.5)        | <b>0.9 (0.8–1.0)</b>                | <b>0.9 (0.6–1.0)</b>                                         | <b>0.9 (0.6–1.0)</b>                                                  |

IQR = interquartile range; SD = standard deviation. Bold: mean or median ventilator-to-bed ratio below 1.0.

**Table 6. Ventilators at veterinary facilities, by jurisdiction and location type**

|                              | <b>Total</b> | <b>Metropolitan</b> | <b>Regional</b> |
|------------------------------|--------------|---------------------|-----------------|
| Australian Capital Territory | 4            | 4                   | 0               |
| New South Wales              | 75           | 58                  | 17              |
| Northern Territory           | 2            | 2                   | 0               |
| Queensland                   | 36           | 21                  | 15              |
| South Australia              | 8            | 8                   | 0               |
| Tasmania                     | 0            | 0                   | 0               |
| Victoria                     | 47           | 38                  | 9               |
| Western Australia            | 16           | 16                  | 0               |
| <b>Total</b>                 | <b>188</b>   | <b>147</b>          | <b>41</b>       |

**Table 7. Renal replacement therapy machines at the 175 respondent surge survey intensive care units (ICUs), by category and jurisdiction**

|                              | <b>ICU-specific<br/>haemofilters/dialysis<br/>machines</b> | <b>Other machines for<br/>haemodialysis</b> | <b>Total</b> |
|------------------------------|------------------------------------------------------------|---------------------------------------------|--------------|
| <b>Category</b>              |                                                            |                                             |              |
| Tertiary                     | 194                                                        | 206                                         | 400          |
| Metropolitan                 | 67                                                         | 119                                         | 186          |
| Rural/regional               | 51                                                         | 187                                         | 238          |
| Private                      | 118                                                        | 154                                         | 272          |
| Paediatric                   | 15                                                         | 9                                           | 24           |
| <b>Jurisdiction</b>          |                                                            |                                             |              |
| Australian Capital Territory | 11                                                         | 8                                           | 19           |
| New South Wales              | 171                                                        | 288                                         | 459          |
| Northern Territory           | 10                                                         | 2                                           | 12           |
| Queensland                   | 23                                                         | 89                                          | 112          |
| South Australia              | 20                                                         | 32                                          | 52           |
| Tasmania                     | 12                                                         | 14                                          | 26           |
| Victoria                     | 153                                                        | 170                                         | 323          |
| Western Australia            | 45                                                         | 72                                          | 117          |
| <b>Total</b>                 | <b>445</b>                                                 | <b>675</b>                                  | <b>1120</b>  |

**Table 8. Extracorporeal membrane oxygenation (ECMO) equipment at the 175 respondent surge survey intensive care units, by category and jurisdiction**

|                              | ECMO machines | Machines used for cardiopulmonary bypass |
|------------------------------|---------------|------------------------------------------|
| Category                     |               |                                          |
| Tertiary                     | 98            | 38                                       |
| Metropolitan                 | 4             | 2                                        |
| Rural/regional               | 14            | 4                                        |
| Private                      | 9             | 42                                       |
| Paediatric                   | 21            | 13                                       |
| Jurisdiction                 |               |                                          |
| Australian Capital Territory | 1             | 1                                        |
| New South Wales              | 58            | 31                                       |
| Northern Territory           | 0             | 0                                        |
| Queensland                   | 24            | 14                                       |
| South Australia              | 11            | 6                                        |
| Tasmania                     | 6             | 3                                        |
| Victoria                     | 36            | 33                                       |
| Western Australia            | 10            | 11                                       |
| Total                        | 146           | 99                                       |

**Table 9. Intravenous infusion pumps at the 175 surge respondent survey intensive care units, by category and jurisdiction**

|                              | Intravenous infusion pumps |
|------------------------------|----------------------------|
| Category                     |                            |
| Tertiary                     | 3509                       |
| Metropolitan                 | 1589                       |
| Rural/regional               | 1639                       |
| Private                      | 5139                       |
| Paediatric                   | 962                        |
| Jurisdiction                 |                            |
| Australian Capital Territory | 282                        |
| New South Wales              | 5282                       |
| Northern Territory           | 80                         |
| Queensland                   | 1089                       |
| South Australia              | 192                        |
| Tasmania                     | 462                        |
| Victoria                     | 4100                       |
| Western Australia            | 1351                       |
| Total                        | 12 838                     |

**Table 10. Annual number of elective surgery patient admissions to 157 Australian intensive care units for which data were available**

|                              | <b>Elective surgery admissions<br/>(proportion of all admissions)</b> | <b>Elective surgery bed-days<br/>(proportion of all bed-days)</b> |
|------------------------------|-----------------------------------------------------------------------|-------------------------------------------------------------------|
| <b>Category</b>              |                                                                       |                                                                   |
| Tertiary                     | 20 413 (29.9%)                                                        | 1 041 729 (18%)                                                   |
| Metropolitan                 | 3368 (12.3%)                                                          | 163 875 (8.1%)                                                    |
| Rural/regional               | 2496 (9.3%)                                                           | 114 070 (6.2%)                                                    |
| Private                      | 40 062 (72.5%)                                                        | 1 660 403 (60.8%)                                                 |
| <b>Jurisdiction</b>          |                                                                       |                                                                   |
| Australian Capital Territory | 2391 (48.4%)                                                          | 98 084 (29.0%)                                                    |
| New South Wales              | 21 504 (36.8%)                                                        | 1 002 206 (23.4%)                                                 |
| Northern Territory           | 209 (12.0%)                                                           | 14 438 (10.0%)                                                    |
| Queensland                   | 12 259 (41.4%)                                                        | 511 567 (25.5%)                                                   |
| South Australia              | 5656 (45.1%)                                                          | 258 314 (29.6%)                                                   |
| Tasmania                     | 256 (14.8%)                                                           | 15 911 (12.2%)                                                    |
| Victoria                     | 14 753 (36.0%)                                                        | 671 688 (24.6%)                                                   |
| Western Australia            | 5312 (39.8%)                                                          | 229 102 (25.8%)                                                   |
| <b>Total</b>                 | <b>62 340 (38.1%)</b>                                                 | <b>2 801 310 (24.6%)</b>                                          |
